# Supplementary material for: Evaluation of the Growth-Inhibitory Spectrum of Three Types of Cyanoacrylate Nanoparticles on Gram-Positive and Gram-Negative Bacteria
Source: MDPI journal article supplement (doi:10.3390/membranes12080782), 2022-08-15
Supplement: s1 [file s1]

## *Supplementary Material*

### **1 Supplementary Figures**

#### **1.1 Supplementary Figures**

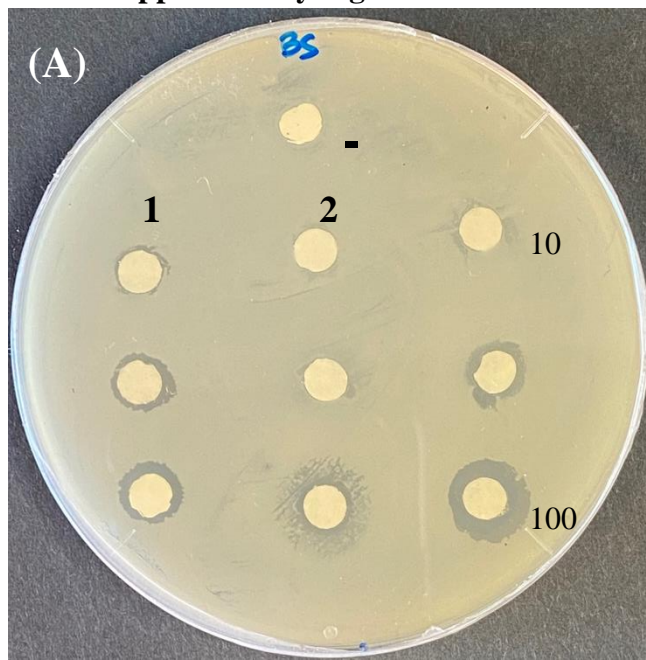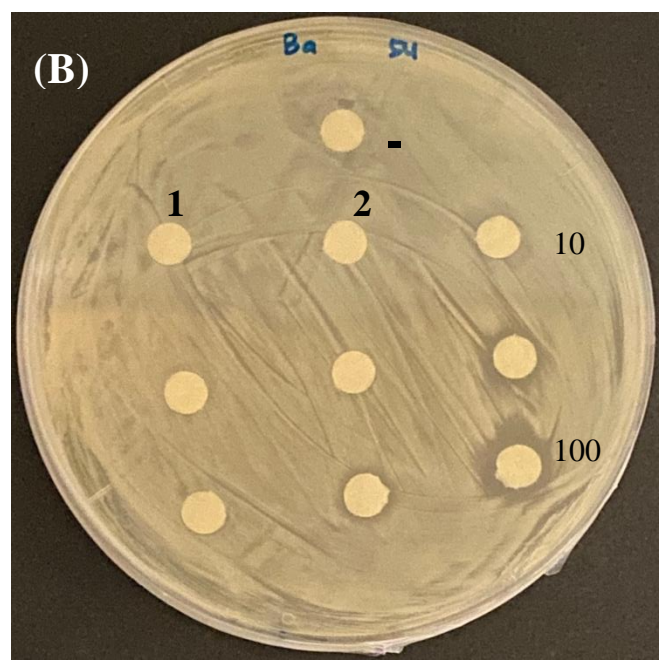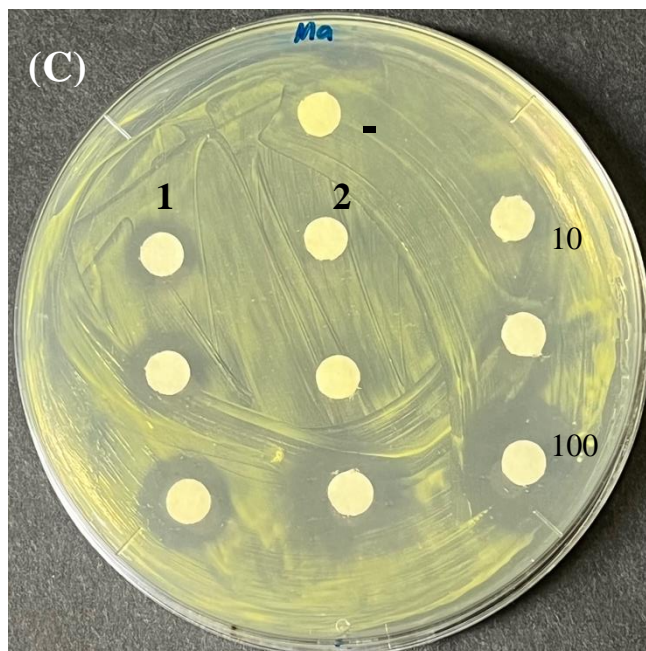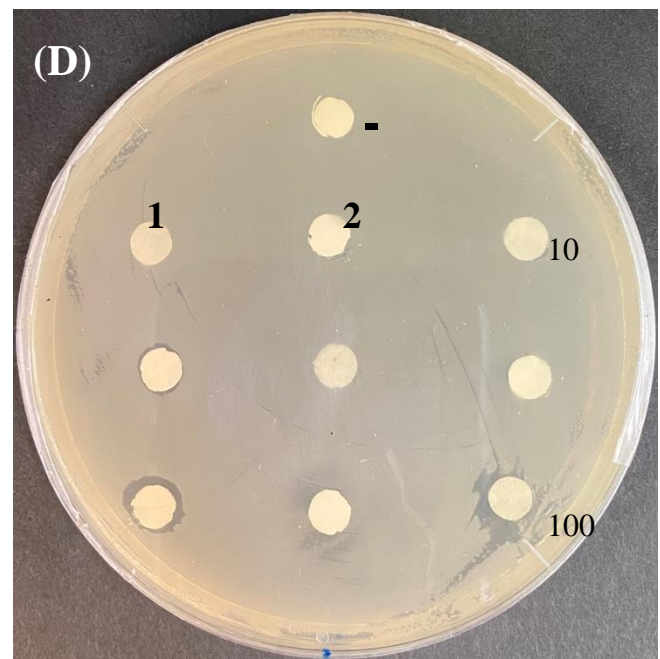

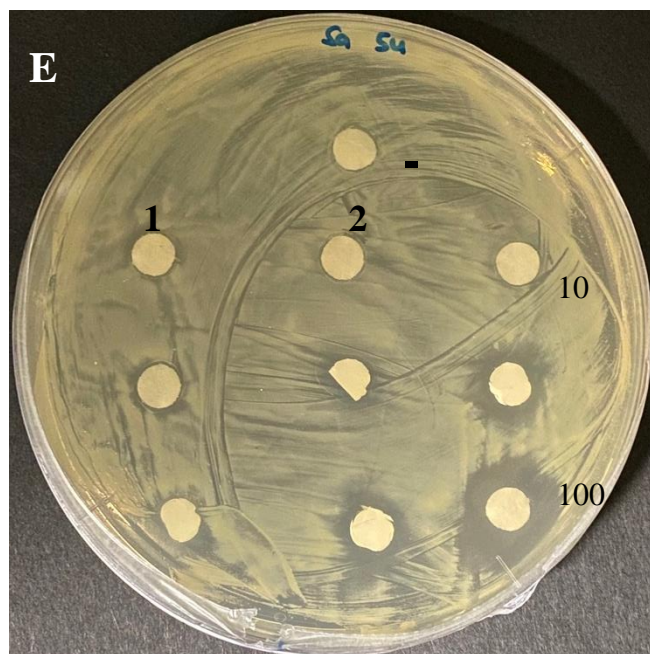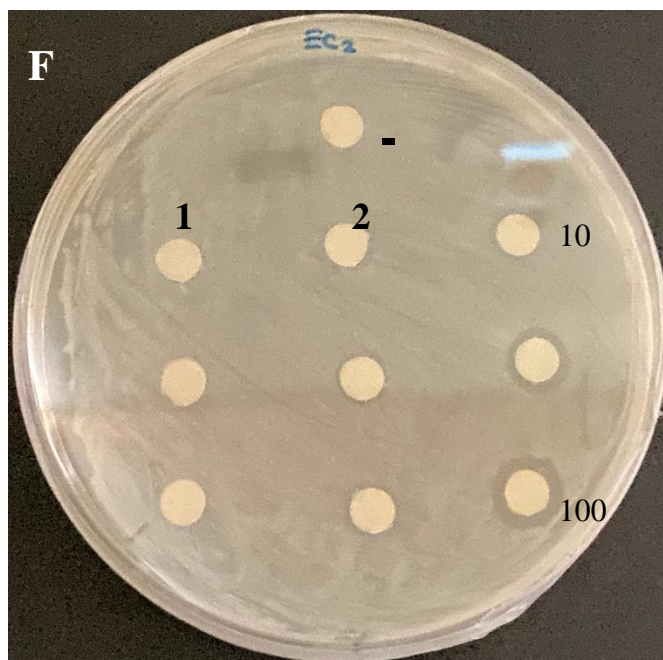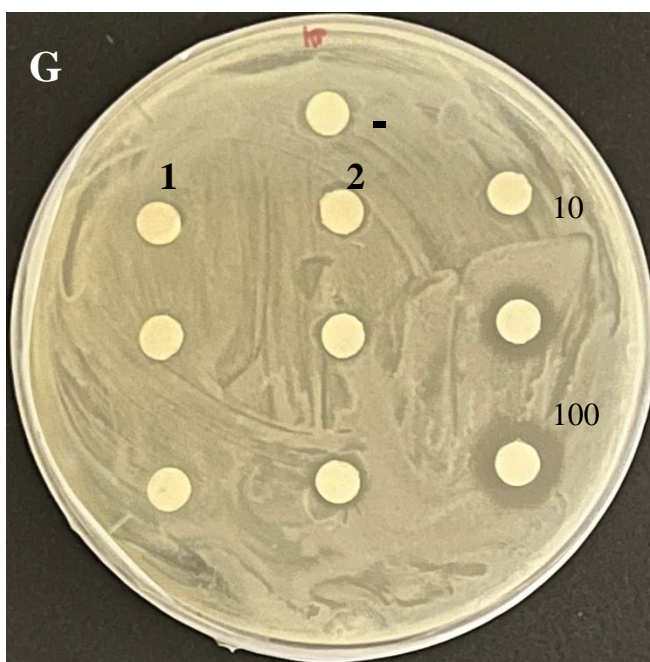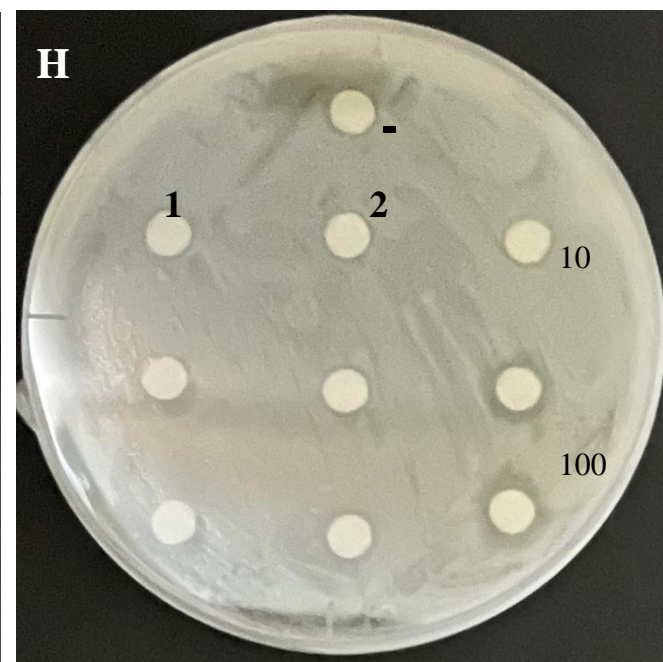



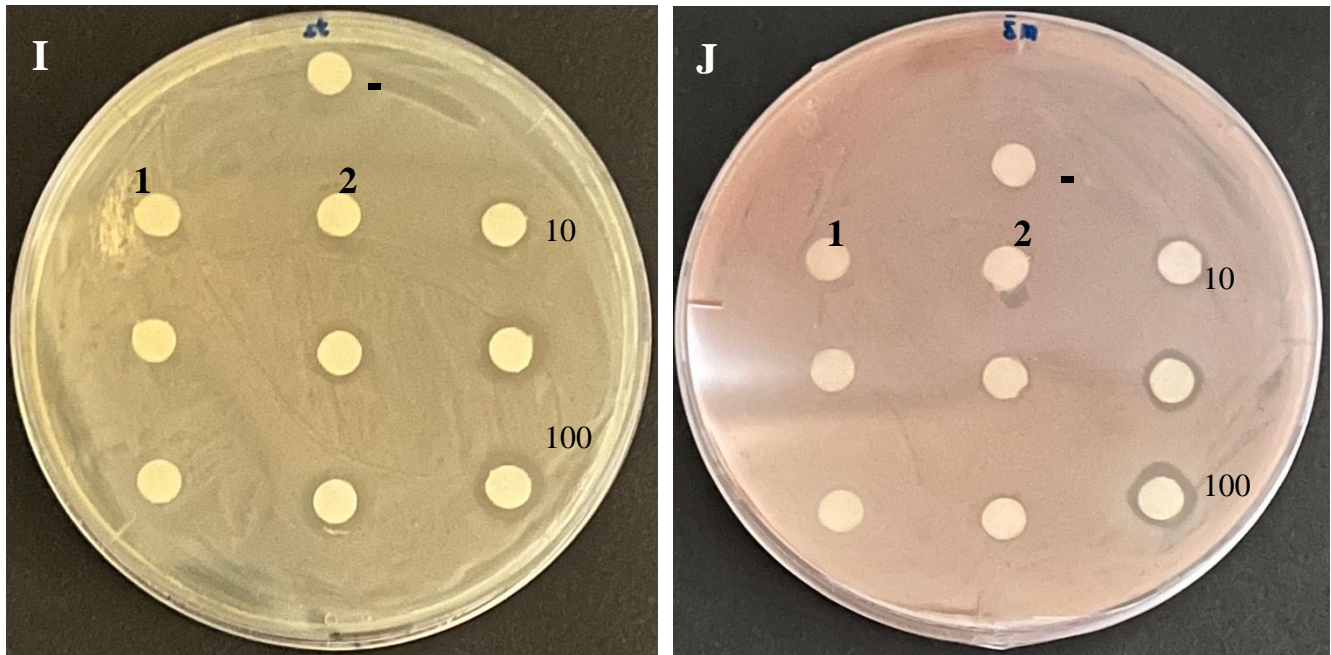

**Supplementary Figure S1.** Non cell growth zone appeared around paper disks containing iBCA-NPs, EECA-NPs, or ECA-NPs. Gram-positive bacteria: A, *Bacillus subtilis*; B, *Brevibacillus agri*; C, *Microbacterium aurum*; D, *Propobacterium acnes*; E, *Staphylococcus aureus*; Gram-negative bacteria: F, *Escherichia coli*; G, *Klebsiella pneumoniae*; H, *Pseudomonas aeruginosa*; I, *Salmonella typhimurium*; J, *Serratia marcescens*.

(-), control paper disk contains Tween80; 1, paper disk contains iBCA-NPs; 2, paper disk contains EECA-NPs; 3, paper disk contains ECA-NPs.

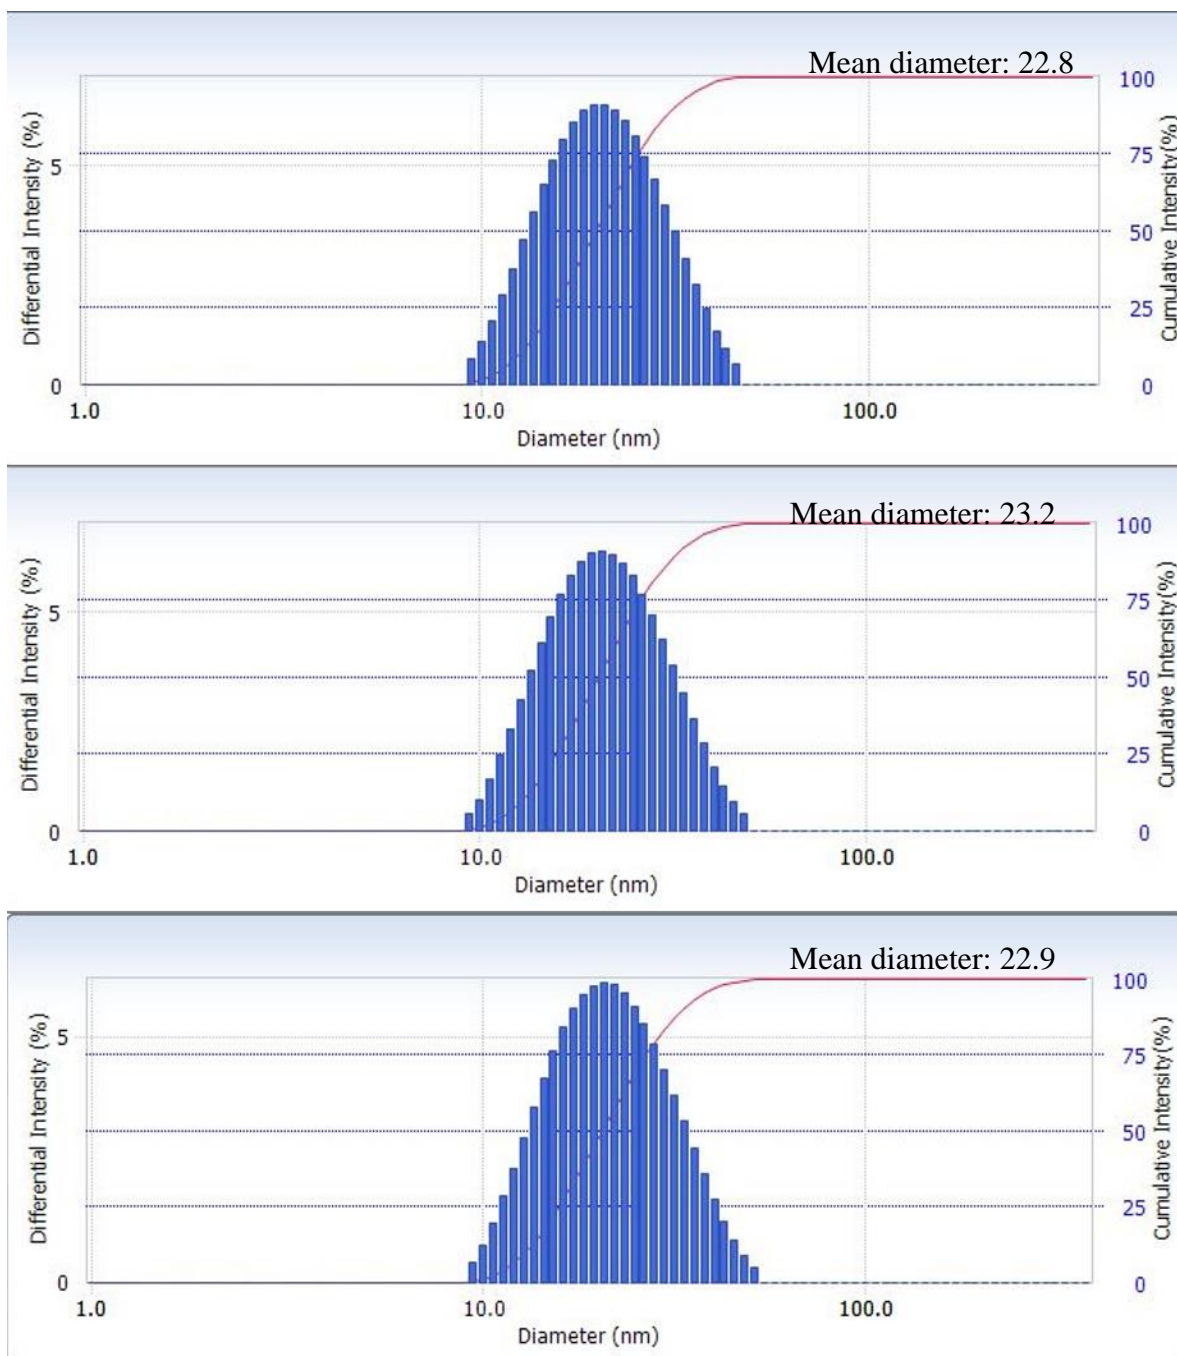

**Supplementary Figure S2.** Particle size distribution histogram of iBCA-NPs used in the present study.

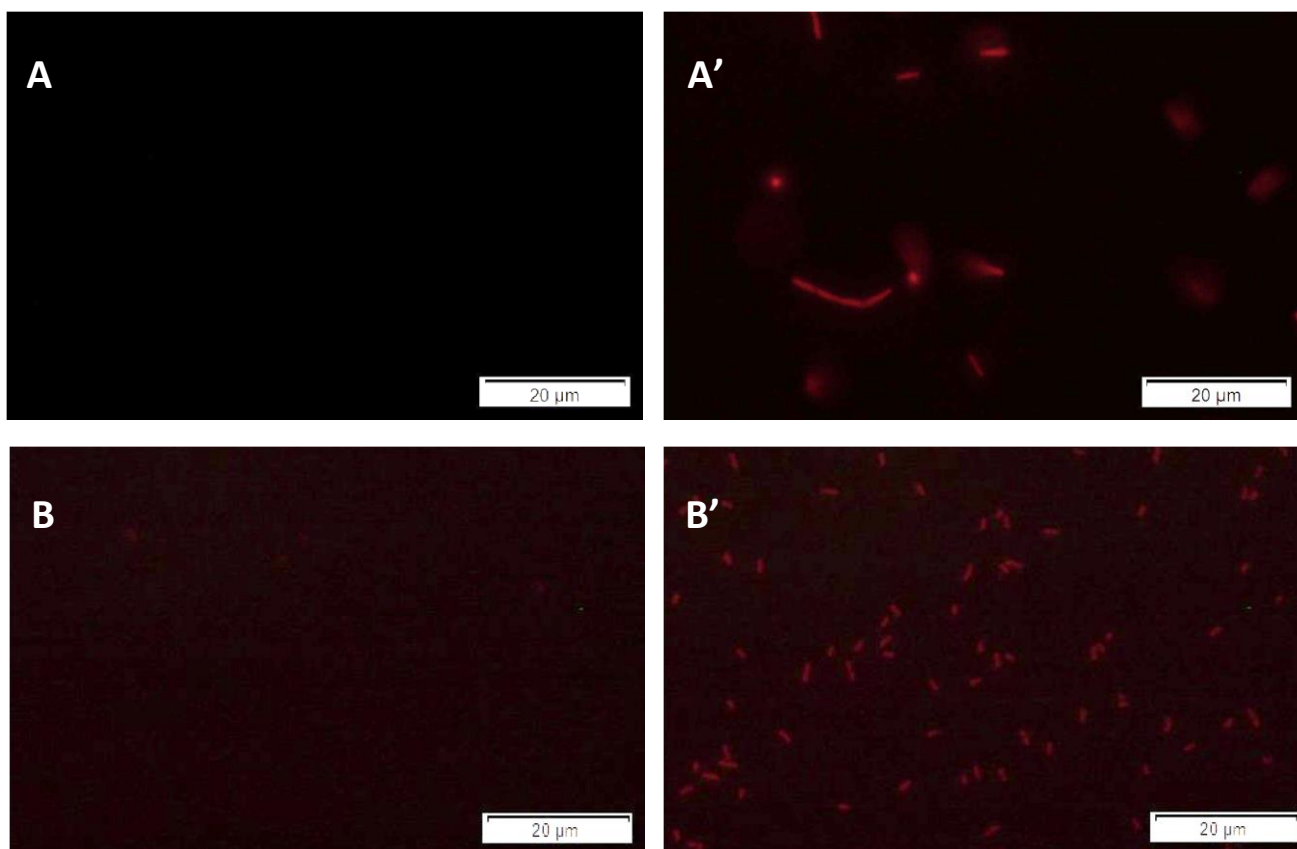

**Supplementary Figure S3.** Fluorescence microscopy of cells after 2 h exposure with 100 mg/L of ECA-NPs and untreated cells. Fluorescence probe PI was used to detect the cell membrane damage. (A), *Bacillus subtilis* (Gram-positive); (B), *Escherichia coli* (Gram-negative); alphabet, fluorescence of untreated cells; alphabet with quotation mark ('), fluorescence image of treated samples.
